# Supplementary material for: Circular RNA circSCAF11 Accelerates the Glioma Tumorigenesis through the miR-421/SP1/VEGFA Axis
Source: PubMed Central journal article supplement — Mol Ther Nucleic Acids. 2019 Jul 5;17:669–77. doi: 10.1016/j.omtn.2019.06.022 (PMC6700438; doi:10.1016/j.omtn.2019.06.022), 2019-07-05
Supplement: mmc1.pdf [file mmc1.pdf]

**OMTN, Volume 17**

**Supplemental Information**

**Circular RNA circSCAF11 Accelerates  
the Glioma Tumorigenesis  
through the miR-421/SP1/VEGFA Axis**

**Qiang Meng, Shuai Li, Yong Liu, Shitao Zhang, Jungong Jin, Yu Zhang, Chen Guo, Bei Liu, and Yang Sun**

**Supplement Table 1.** Primers sequences for qRT-PCR and sequences of siRNA.

|                   | Sequences                                                                        |
|-------------------|----------------------------------------------------------------------------------|
| circSCAF11        | forward, 5' - CCTTGCACCCCTTCCCGG-3'<br>reverse, 5' - CAGGCAGAAGGCGGTCAG-3'       |
| miR-421           | forward, 5'-GATTGCACGTTTTTCAGGTG-3'<br>reverse, 5'-GCAGCACATCATTATTACA-3'        |
| si-circSCAF11-1   | 5' - CTCAGTCAAGCTACCAGCCGT-3'                                                    |
| si-circSCAF11-2   | 5' - ATCCAGCCGCAGATACGTCGT-3'                                                    |
| si-circSCAF11-3   | 5' - TCTCCAAGCAGGCCATACGTC-3'                                                    |
| SP1               | forward, 5'-ATCCTACATTGGCCATGAGGCATC-3'<br>reverse, 5'-CATTAAAGGTGTGCATTCCGGC-3' |
| VEGFA             | forward, 5'-CTAGGAAAATCGACCAGATGCC-3'<br>reverse, 5'-AGCGCGTGTTGCAGGTCTTGGAT-3'  |
| miR-421 inhibitor | 5'-AGGGUUTGGGGAUAUCGGAC-3';                                                      |
| miR-421 mimics    | 5'-GTCCAGTTGGCGAAGGAATCCCT-3';                                                   |
| GAPDH             | forward, 5'-AGAAGGCTGGGGCTCATTTG-3'<br>reverse, 5'-AGGGGCCATCCACAGTCTTC-3'       |
| Promotor E1       | sense, 5'-CGCCTGCTCGTTTTTCTGC-3'<br>Antisense, 5'-CCCCGCTTTGTTTTCTGGC-3'         |
